# Supplementary material
Source: MDPI journal article supplement (https://www.mdpi.com/2079-6412/11/12/1491)
Supplement: s1 [file s1 › coatings-1470074-supplementary.pdf]

# Supplementary: Enhanced Piezoresponse and Dielectric Properties for $\text{Ba}_{1-x}\text{Sr}_x\text{TiO}_3$ Composition Ultrathin Films by the High-Throughput Method

Nana Zhang <sup>1</sup>, Di Wang <sup>1</sup>, Jie Wang <sup>2</sup>, Hong Fang <sup>2</sup>, Bin He <sup>1,\*</sup>, Jinrui Guo <sup>1</sup>, Yue Han <sup>2</sup>, Peng Zhang <sup>1</sup>, Chaoqun Shi <sup>1</sup>, Yanan Chen <sup>1</sup>, Qixiang Wang <sup>2</sup>, Miaojuan Ren <sup>1</sup> and Weiming Lü <sup>1,2,\*</sup>

<sup>1</sup> Spintronics Institute, School of Physics and Technology, University of Jinan, Jinan 250022, China; zhang-nana@mail.ujn.edu.cn (N.Z.); wangdi@mail.ujn.edu.cn (D.W.); JinRuiGuo@stu.ujn.edu.cn (J.G.); 202021100179@stu.ujn.edu.cn (P.Z.); 202021100153@stu.ujn.edu.cn (C.S.); 202021100178@mail.ujn.edu.cn (Y.C.); ss\_renmj@ujn.edu.cn (M.R.)

<sup>2</sup> Condensed Matter Science and Technology Institute, School of Instrumentation Science and Engineering, Harbin Institute of Technology, Harbin 150080, China; 19B901040@stu.hit.edu.cn (J.W.); 20b901026@stu.hit.edu.cn (H.F.); 20b901027@stu.hit.edu.cn (Y.H.); 18B911042@stu.hit.edu.cn (Q.W.)

\* Correspondence: sdy\_heb@ujn.edu.cn (B.H.); weiminglv@hit.edu.cn (W.L.)

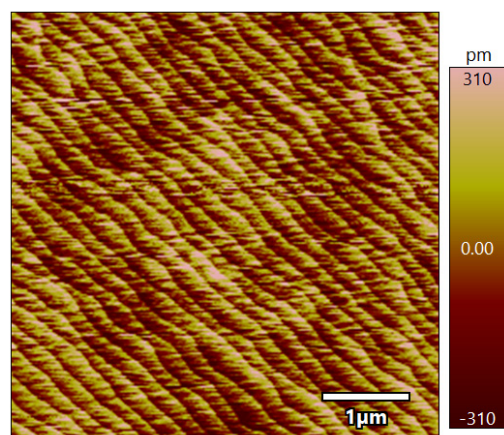

**Figure S1.** Surface images of Nb:STO substrate with atomic-terrace.

**Citation:** Zhang, N.; Wang, D.; Wang, J.; Fang, H.; He, B.; Guo, J.; Han, Y.; Zhang, P.; Shi, C.; Chen, Y.; et al. Enhanced Piezoresponse and Dielectric Properties for  $\text{Ba}_{1-x}\text{Sr}_x\text{TiO}_3$  Composition Ultrathin Films by the High-Throughput Method. *Coatings* **2021**, *11*, 1491. <https://doi.org/10.3390/coatings11121491>

Received: 3 November 2021

Accepted: 29 November 2021

Published: 3 December 2021

**Publisher's Note:** MDPI stays neutral with regard to jurisdictional claims in published maps and institutional affiliations.

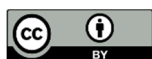

**Copyright:** © 2021 by the authors. Submitted for possible open access publication under the terms and conditions of the Creative Commons Attribution (CC BY) license (<https://creativecommons.org/licenses/by/4.0/>).

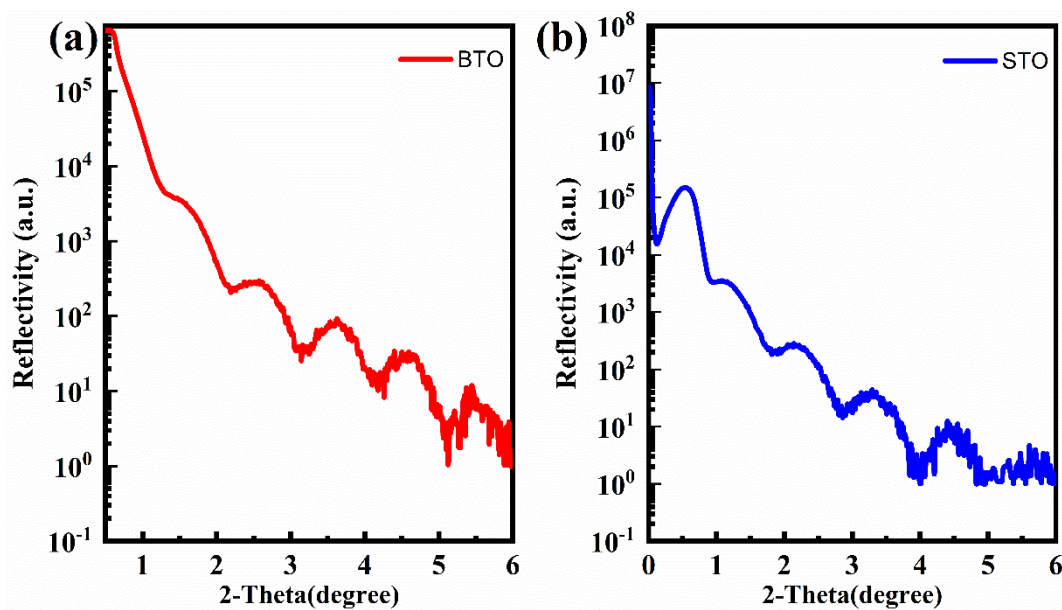

**Figure S2.** X-ray reflectometry measurements for BTO (a) and STO (b).

Figure S2 shows XRR patterns for BTO film and STO film which use a commercial software to simulate and calculates reflectivity curves from the first principles based on a physical model of the film stack. Then we can obtain the thickness value of film. The thickness of each layer is controlled by the number of laser pulses. Thus BTO and STO growth rates were confirmed at about 27 and 29 pulses per unit.

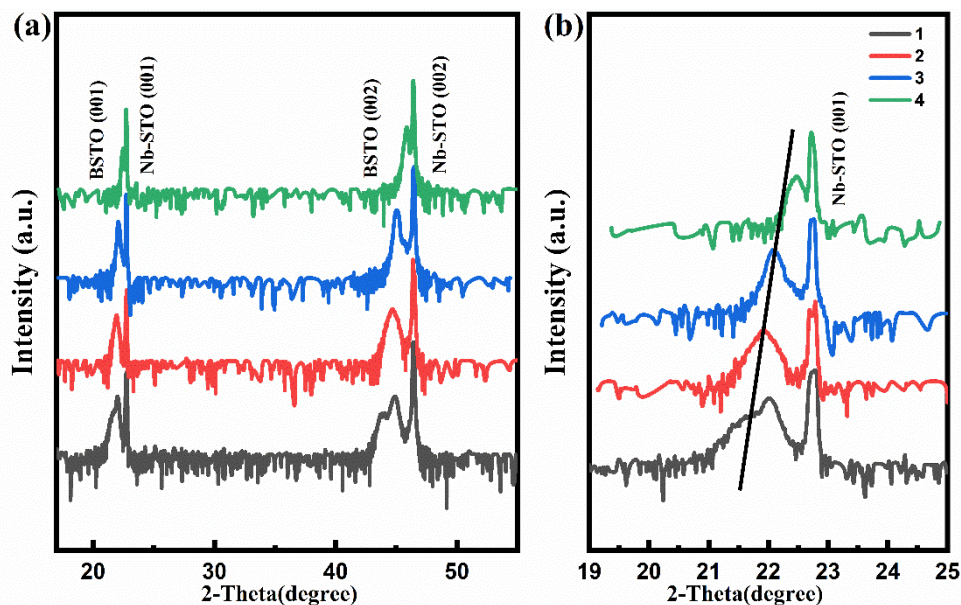

**Figure S3.** (a) XRD measurements of the BSTO thin film (80 nm) of four representing positions with increasing Sr content. (b) XRD pattern around (001) reflection (From Part 1 to 4, Sr content increases).

The XRD patterns of BSTO films on the Nb-STO substrate are shown in Figure S3. As Sr increasing, the BSTO (001) peak shifts closer to Nb-STO (001) peak as shown in Figure S3 (b). The shift is consistent to the varying composition. Compare to bulk BTO value, the *c* lattice constants decreased. The shift is consistent to the varying composition, indicating that the BSTO composition spread thin film can successfully be fabricated by LMBE with Mask.
